# Supplementary material for: Multinary PtPdNiP truncated octahedral mesoporous nanocages for enhanced methanol oxidation electrocatalysis
Source: Royal Society of Chemistry journal article supplement (doi:10.1039/d0nj03369c), 2020-01-01
Supplement: d0nj03369c1.pdf [file d0nj03369c1.pdf]

Electronic Supplementary Information for

**Multinary PtPdNiP truncated octahedral mesoporous nanocages for  
enhanced methanol oxidation electrocatalysis**

Hongjing Wang, Songliang Liu, Hugang Zhang, Shuli Yin, You Xu, Xiaonian Li,

Ziqiang Wang,\* and Liang Wang\*

State Key Laboratory Breeding Base of Green-Chemical Synthesis Technology, College of  
Chemical Engineering, Zhejiang University of Technology, Hangzhou 310014, P. R. China.

Corresponding authors' E-mails: zqwang@zjut.edu.cn; wangliang@zjut.edu.cn

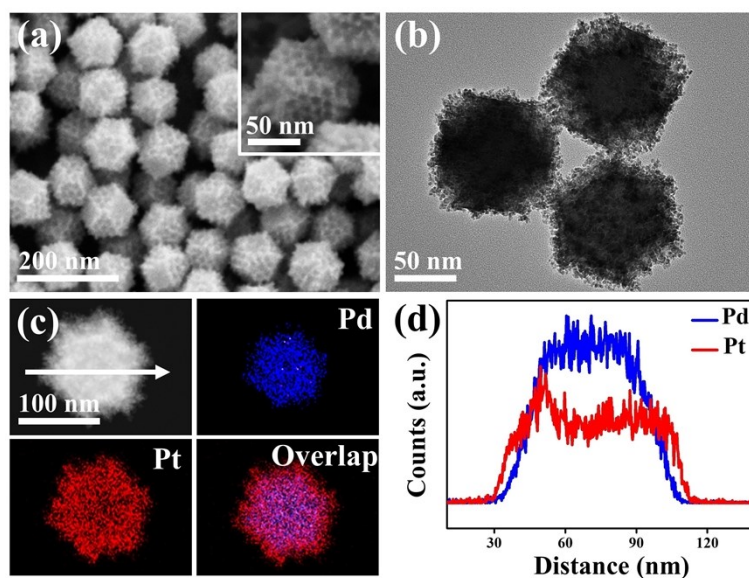

**Fig. S1** (a) SEM and (b) TEM images of Pd@PtPd MTOs. (c) HAADF-STEM image and corresponding EDX elemental mappings images and (d) line-scanning profile of Pd@PtPd MTOs.

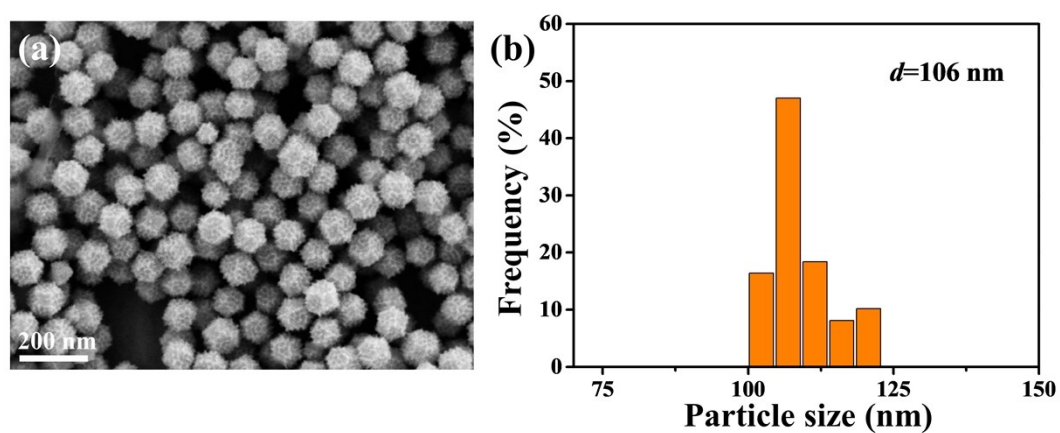

**Fig. S2** Histogram of particle size distribution for the Pd@PtPd MTOs.

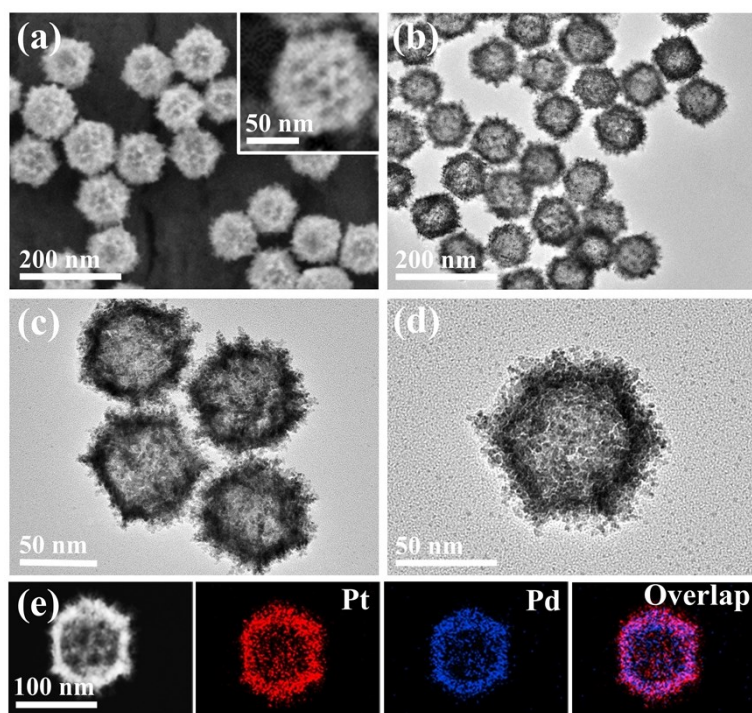

**Fig. S3** (a) SEM and (b-d) TEM images of PtPd TOMNs. (e) HAADF-STEM image of one PtPd TOMN nanoparticle and corresponding EDX elemental mappings images.

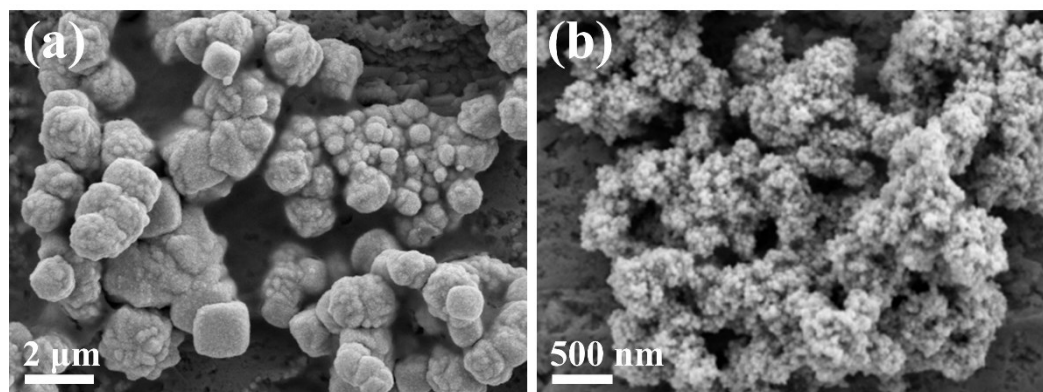

**Fig. S4** SEM images of the samples prepared under the typical conditions without (a) F127 and by replacing F127 with (b) PVP.

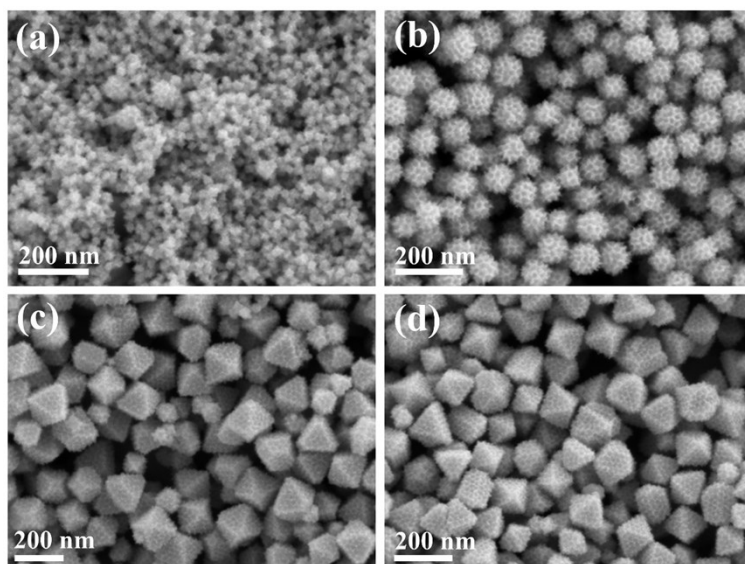

**Fig. S5** SEM images of the samples prepared with different amounts of HCl under the typical synthesis: (a) 0 mL, (b) 0.1 mL, (c) 0.3 mL (d) 0.4 mL.

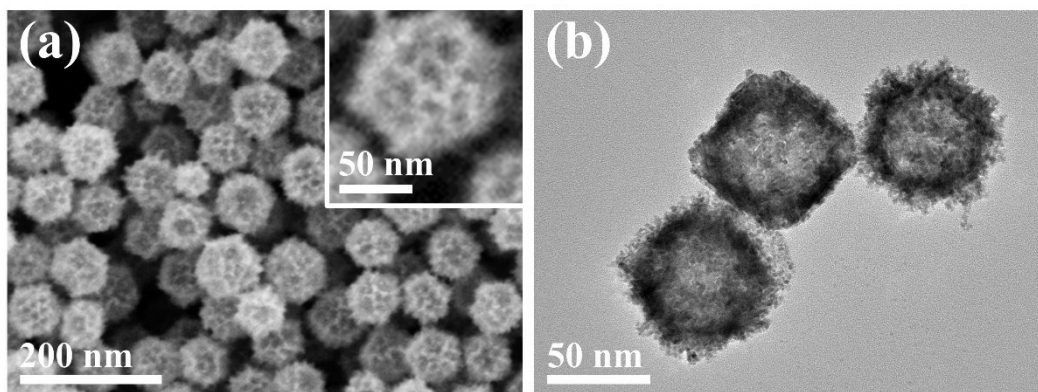

**Fig. S6** (a) SEM and (b) TEM images of PtPdNi TOMNs.

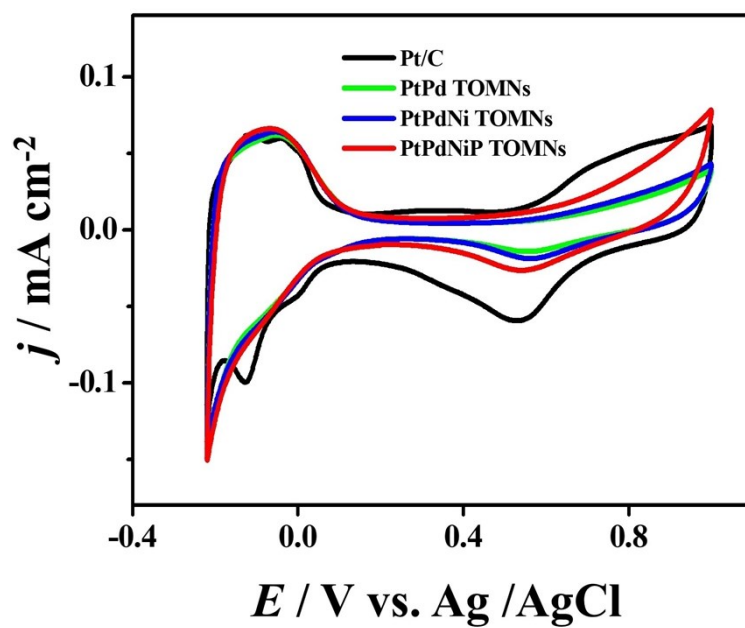

**Fig. S7** CVs of the catalysts recorded in  $N_2$ -saturated 0.5 M  $H_2SO_4$  solution with a scan rate of 50  $mV s^{-1}$ .

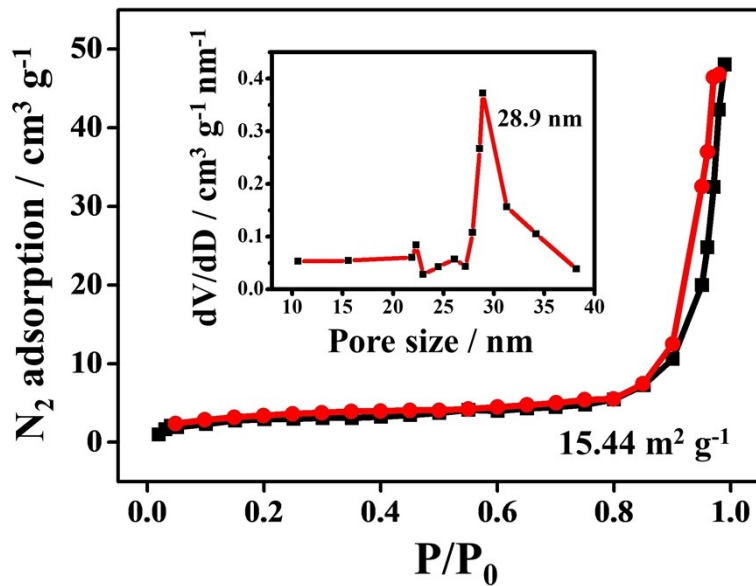

**Fig. S8**  $N_2$  adsorption-desorption isotherms for PtPdNiP TOMNs. The inset is the BJH pore-size distribution curves.

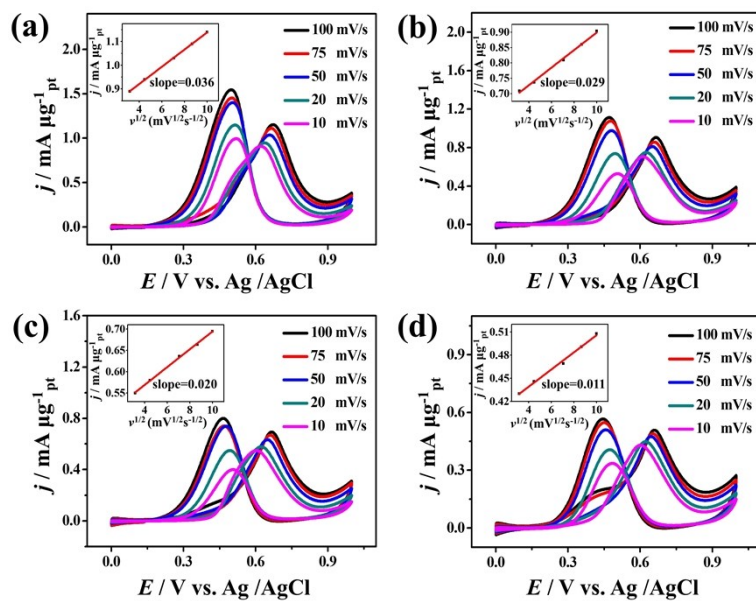

**Fig. S9** CVs at different scan rates and their corresponding fitted plot of the  $j_m$  vs. the  $v^{1/2}$  for the (a) PtPdNiP TOMNs, (b) PtPdNi TOMNs, (c) PtPd TOMNs and (d) Pt/C.

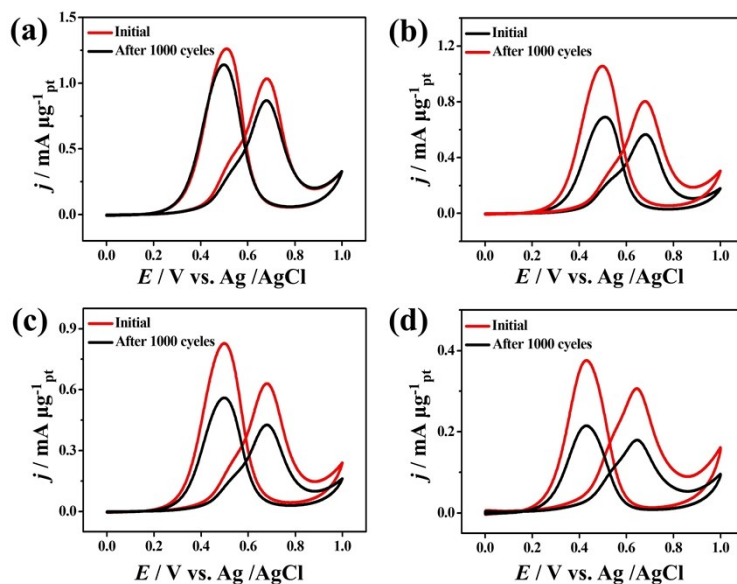

**Fig. S10** CVs of MOR recorded in 0.5 M  $\text{H}_2\text{SO}_4$  solution with 1.0 M  $\text{CH}_3\text{OH}$  at scan rate of 50  $\text{mV s}^{-1}$  before and after durability test for (a) PtPdNiP TOMNs, (b) PtPdNi TOMNs, (c) PtPd TOMNs and (d) Pt/C.



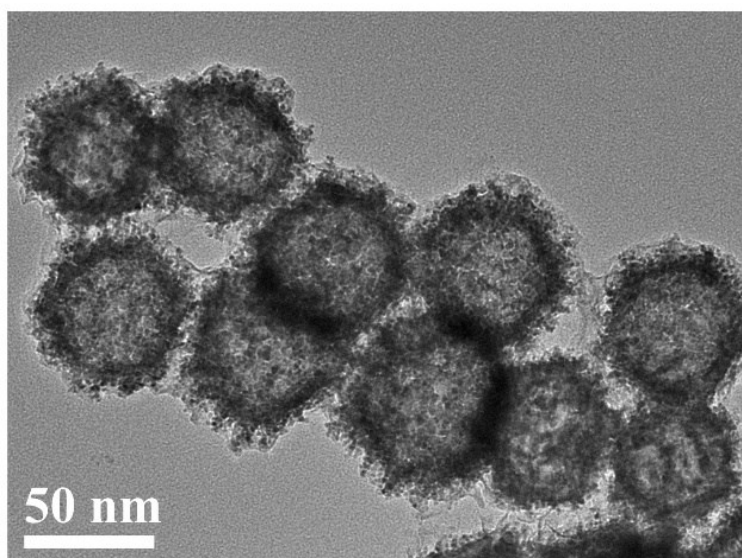

**Fig. S11** TEM image of the PtPdNiP TOMNs after the durability test.

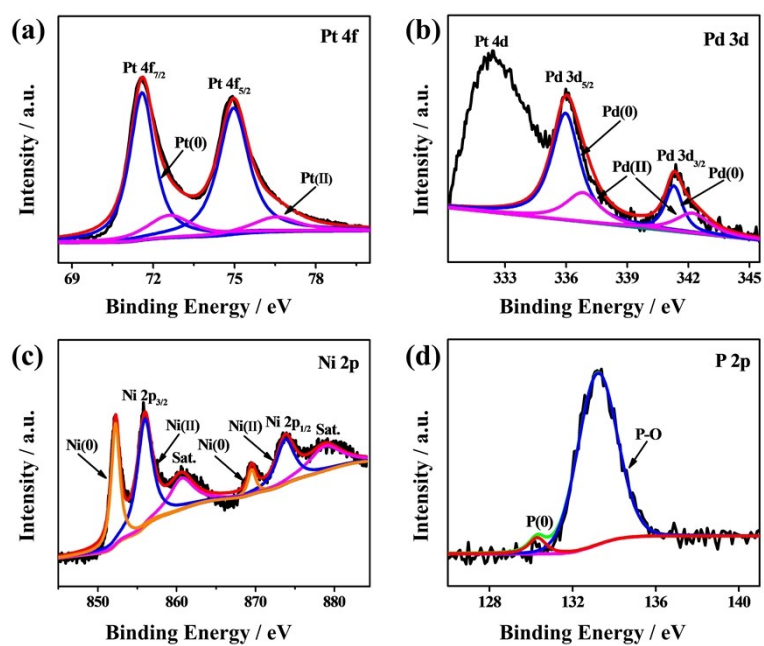

**Fig. S12** XPS spectra of PtPdNiP TOMNs in (a) Pt 4f (b) Pd 3d (c) Ni 2p and (d) P 2p regions after the durability test.

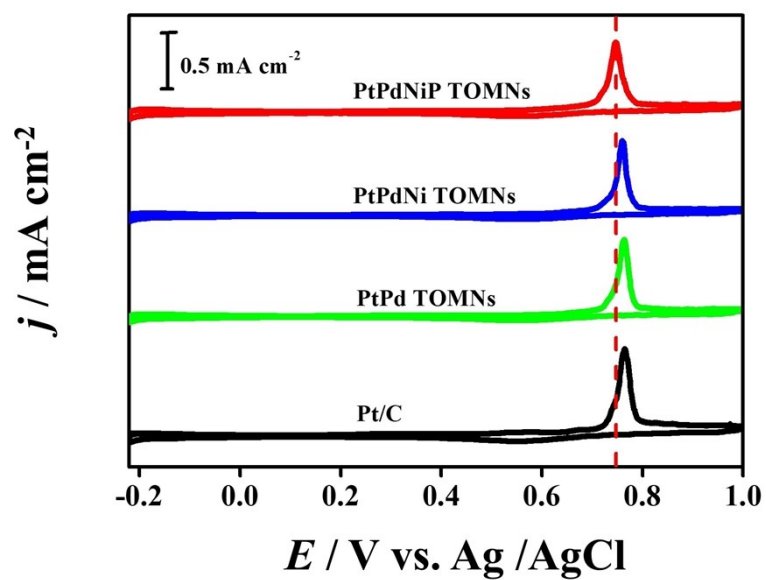

**Fig. S13** CO-stripping curves of different catalysts tested in a CO-saturated 0.5 M  $\text{H}_2\text{SO}_4$  solution at a scan rate of  $50 \text{ mV s}^{-1}$ .



**Table S1** Comparisons of the MOR performance of PtPdNiP TOMNs with other reported Pt-based electrocatalysts.

| Catalysts                                | Condition                                                                     | Scan rate<br>(mV s <sup>-1</sup> ) | Mass activity<br>(A mg <sup>-1</sup> Pt) | Ref.             |
|------------------------------------------|-------------------------------------------------------------------------------|------------------------------------|------------------------------------------|------------------|
| <b>PtPdNiP TOMNs</b>                     | <b>0.5 M H<sub>2</sub>SO<sub>4</sub> containing<br/>1.0M CH<sub>3</sub>OH</b> | <b>50</b>                          | <b>1.04</b>                              | <b>This work</b> |
| PtPdCo MHNPs                             | 0.5 M H <sub>2</sub> SO <sub>4</sub> containing<br>1.0M CH <sub>3</sub> OH    | 50                                 | 0.91                                     | 1                |
| Pt Nanoparticles                         | 0.5 M H <sub>2</sub> SO <sub>4</sub> containing<br>1.0M CH <sub>3</sub> OH    | 50                                 | 0.87                                     | 2                |
| Pt-Pd-Cu<br>Nanodendrites                | 0.5 M H <sub>2</sub> SO <sub>4</sub> containing<br>1.0M CH <sub>3</sub> OH    | 50                                 | 0.69                                     | 3                |
| PtPdTe Nanowire                          | 0.5 M H <sub>2</sub> SO <sub>4</sub> containing<br>1.0M CH <sub>3</sub> OH    | 50                                 | 0.59                                     | 4                |
| Hollow Pt–Pd<br>Nanocages                | 0.5 M H <sub>2</sub> SO <sub>4</sub> containing<br>1.0M CH <sub>3</sub> OH    | 50                                 | 0.58                                     | 5                |
| Pt Nanowires                             | 0.5 M H <sub>2</sub> SO <sub>4</sub> containing<br>1.0M CH <sub>3</sub> OH    | 50                                 | 0.46                                     | 6                |
| Au@Pd@Pt Core-<br>Shell<br>Nanoparticles | 0.5 M H <sub>2</sub> SO <sub>4</sub> containing<br>1.0M CH <sub>3</sub> OH    | 50                                 | 0.43                                     | 7                |
| PtAg Octahedral<br>Nanocrystals          | 0.5 M H <sub>2</sub> SO <sub>4</sub> containing<br>1.0M CH <sub>3</sub> OH    | 50                                 | 0.37                                     | 8                |

## References

1. Y. Xu, Y. Li, X. Qian, D. Yang, X. Chai, Z. Wang, X. Li, L. Wang and H. Wang, *Nanoscale*, 2019, **11**, 4781-4787.
2. M. Yan, Q. Jiang, T. Zhang, J. Wang, L. Yang, Z. Lu, H. He, Y. Fu, X. Wang and H. Huang, *J. Mater. Chem. A*, 2018, **6**, 18165-18172.
3. R. Chang, L. Zheng, C. Wang, D. Yang, G. Zhang and S. Sun, *Appl. Catal. B: Environ.*, 2017, **211**, 205-211.
4. H. H. Li, S. Zhao, M. Gong, C. H. Cui, D. He, H. W. Liang, L. Wu and S. H. Yu, *Angew. Chem., Int. Ed.*, 2013, **52**, 7472-7476.
5. L. Wang and Y. Yamauchi, *J. Am. Chem. Soc.*, 2013, **135**, 16762-16765.
6. H. Meng, F. Xie, J. Chen, S. Sun and P. K. Shen, *Nanoscale*, 2011, **3**, 5041-5048.
7. L. Wang and Y. Yamauchi, *Chem. Mater.*, 2011, **23**, 2457-2465.
8. J. Li, H. Rong, X. Tong, P. Wang, T. Chen and Z. Wang, *J. Colloid Interf. Sci.*, 2018, **513**, 251-257.
